# Supplementary material for: Visible light driven water splitting through an innovative Cu-treated-δ-MnO2 nanostructure: probing enhanced activity and mechanistic insights
Source: Royal Society of Chemistry journal article supplement (doi:10.1039/c8nr03027h), 2018-01-01
Supplement: c8nr03027h1.pdf [file c8nr03027h1.pdf]

**Visible light driven water splitting through an innovative Cu-treated- $\delta$ -MnO<sub>2</sub> nanostructure: probing enhanced activity and mechanistic insights**

Kaushik Natarajan<sup>a</sup>, Mohit Saraf<sup>a</sup> and Shaikh M. Mobin<sup>\*a,b,c</sup>

<sup>a</sup>Discipline of Metallurgy Engineering and Materials Science, <sup>b</sup>Discipline of Chemistry, <sup>c</sup>Discipline of Biosciences and Biomedical Engineering, Indian Institute of Technology Indore, Simrol, Khandwa Road, Indore 453552, India

\*Email: xray@iiti.ac.in

Tel: +91731 2438 762

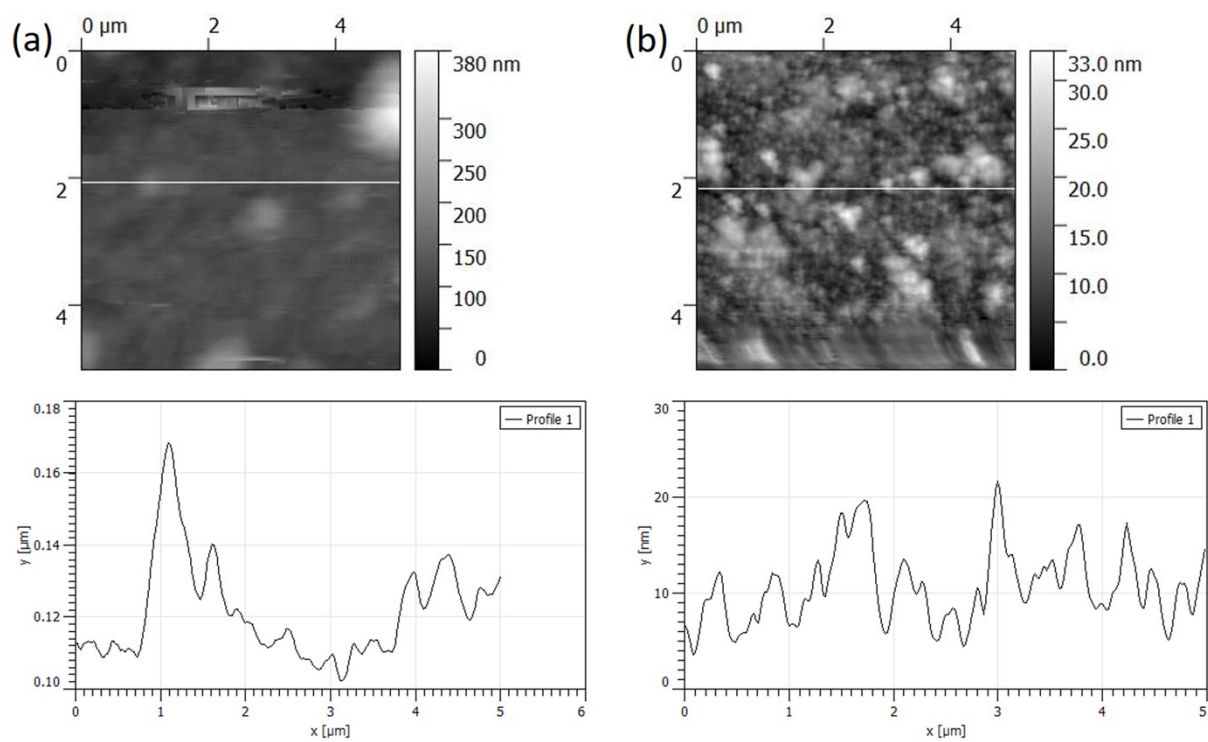

**Fig. S1** AFM analysis of (a)  $\delta$ -MnO<sub>2</sub> and (b) Cu- $\delta$ -MnO<sub>2</sub> thin film samples (over a 5  $\mu\text{m} \times 5 \mu\text{m}$  range).

The actual surface area and the surface roughness of some of the prepared samples have been estimated by AFM measurements as listed in **Table S1** below.

**Table S1.** AFM imaging results for the prepared samples

| <b>Sample</b>                   | <b>Image area<br/>(<math>\mu\text{m}^2</math>)</b> | <b>Root-mean square<br/>roughness, <math>R_q</math><br/>(nm)</b> | <b>Average<br/>roughness,<br/><math>R_a</math><br/>(nm)</b> | <b><math>R_q/R_a</math></b> | <b>Surface area<br/>(<math>\mu\text{m}^2</math>)</b> | <b>Surface<br/>roughness<br/>parameter (<math>R_s</math>)</b> |
|---------------------------------|----------------------------------------------------|------------------------------------------------------------------|-------------------------------------------------------------|-----------------------------|------------------------------------------------------|---------------------------------------------------------------|
| $\delta\text{-MnO}_2$           | 25                                                 | 20.6610                                                          | 35.4991                                                     | 0.582                       | 25.26                                                | 1.0104                                                        |
| $\text{Cu-}\delta\text{-MnO}_2$ | 25                                                 | 35.304                                                           | 45.4798                                                     | 0.7762                      | 26.72                                                | 1.0688                                                        |

Data presented above indicates an increased surface area for the  $\text{Cu-}\delta\text{-MnO}_2$  samples.

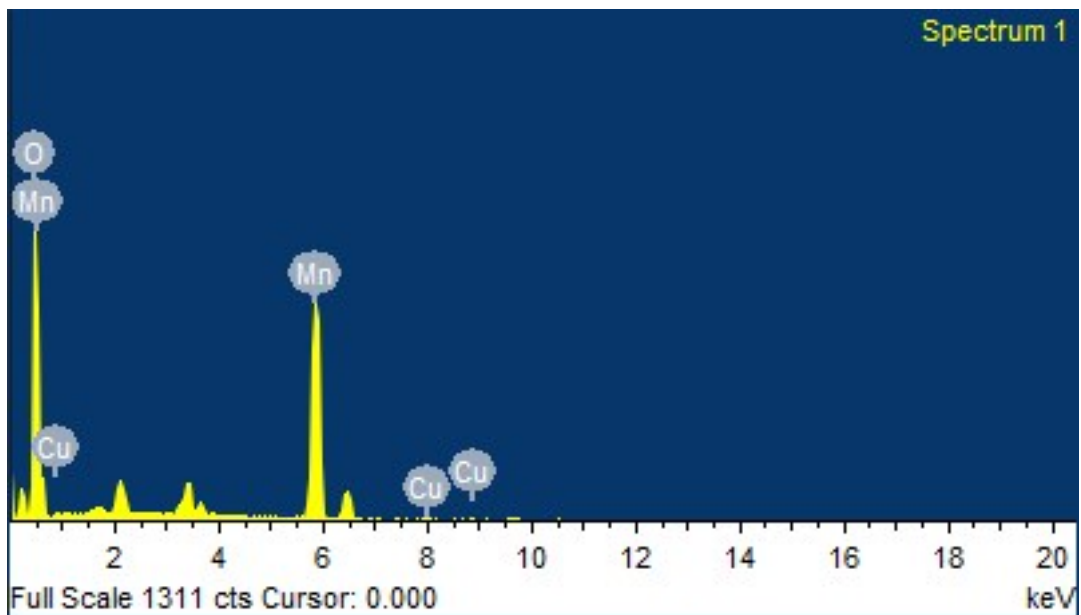

**Fig. S2** EDX analysis of the prepared Cu- $\delta$ -MnO<sub>2</sub> thin film.

Processing option: All elements analyzed (Normalized)  
 Number of iterations = 2

Standard:

O SiO<sub>2</sub> 1-Jun-1999 12:00 AM  
 Mn Mn 1-Jun-1999 12:00 AM  
 Cu Cu 1-Jun-1999 12:00 AM

| Element | Weight% | Atomic% |
|---------|---------|---------|
| O K     | 38.30   | 68.14   |
| Mn K    | 60.25   | 31.21   |
| Cu K    | 1.46    | 0.65    |
| Totals  | 100.00  |         |

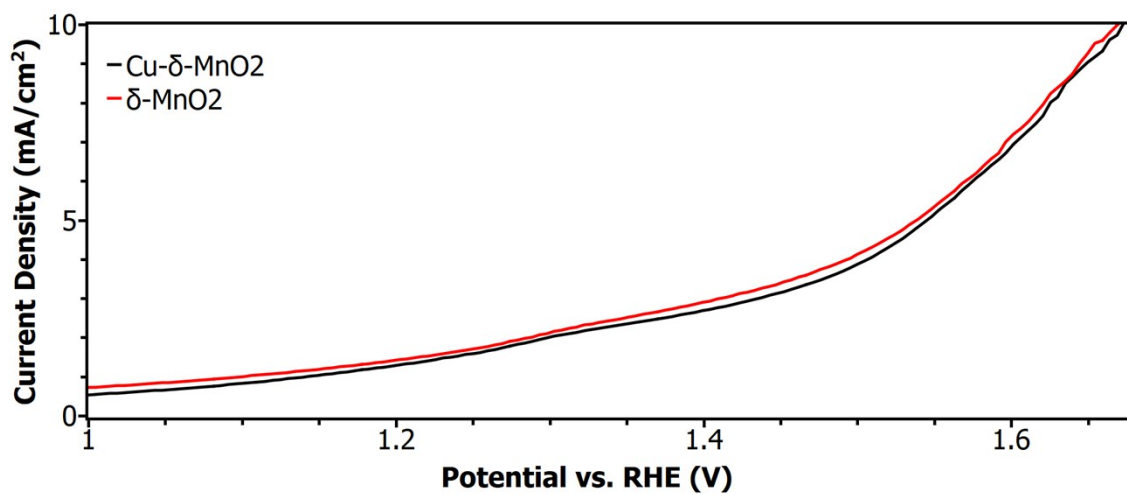

**Fig. S3** Current density-voltage curve of the as-prepared thin film samples for anodic scan (water oxidation) in 1 M NaOH solution (pH = ~13), using Ag/AgCl reference electrode and Pt counter electrode.

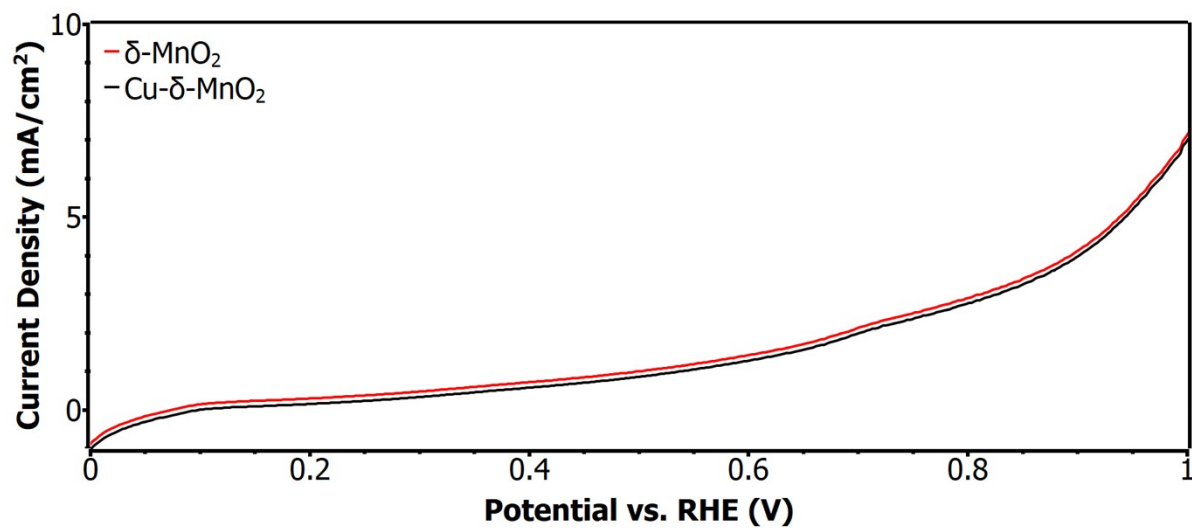

**Fig. S4** Current density-voltage curve of the as-prepared thin film samples for cathodic scan under dark conditions in 1 M Na<sub>2</sub>SO<sub>4</sub> solution (pH = 4.0), using Ag/AgCl reference electrode and Pt counter electrode.

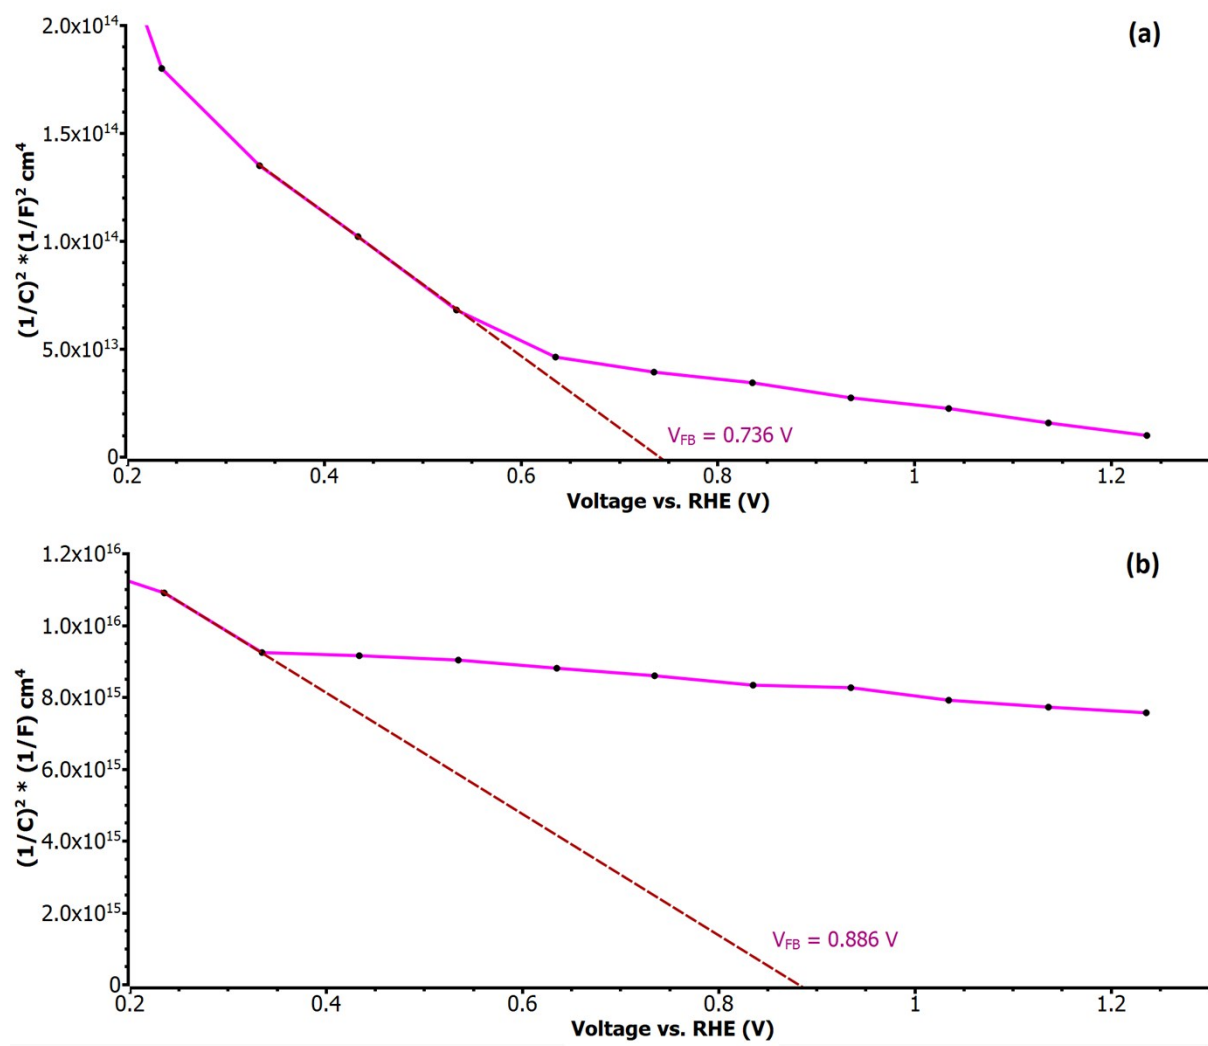

**Fig. S5** Mott-Schottky plots of Cu- $\delta$ -MnO<sub>2</sub> film (a) in dark and (b) in illumination. Note: Mott-Schottky of  $\delta$ -MnO<sub>2</sub> film is the same as (a).

**Table S2.** Comparison table for anodic electrocatalytic current: overpotential required to reach 10 mA/cm<sup>2</sup> anodic current for water oxidation

| <b>Material</b>                                  | <b>Electrolyte</b>      | <b>Overpotential (vs. RHE) to reach 10 mA/cm<sup>2</sup></b> | <b>Reference</b> |
|--------------------------------------------------|-------------------------|--------------------------------------------------------------|------------------|
| Cu <sub>2</sub> S in graphitic carbon nanofibers | 0.25 M phosphate buffer | 401 mV                                                       | [i]              |
| CoNi double hydroxide/CoO                        | 1 M KOH                 | 300 mV                                                       | [ii]             |
| CoNi layered double hydroxide                    | 0.1 M Phosphate buffer  | 390 mV                                                       | [iii]            |
| CuO                                              | 0.1 M KBi               | 430 mV                                                       | [iv]             |
| Cu(OH) <sub>2</sub>                              | 0.1 M KBi               | 550 mV                                                       | [v]              |
| MnO <sub>x</sub>                                 | 0.2 M Borate Buffer     | ~520 mV                                                      | [vi]             |
| δ-MnO <sub>2</sub>                               | 1 M NaOH                | 440 mV                                                       | This work        |



## XPS Acquisition Parameters

### A. Survey Scan

| Acquisition Parameters : |                            |
|--------------------------|----------------------------|
| Parameter                |                            |
| Total acquisition time   | 54.4 secs                  |
| Number of Scans          | 2                          |
| Source Gun Type          | Al K Alpha                 |
| Spot Size                | 900 $\mu\text{m}$          |
| Lens Mode                | Standard                   |
| Analyser Mode            | CAE : Pass Energy 150.0 eV |
| Energy Step Size         | 1.000 eV                   |
| Number of Energy Steps   | 1361                       |

### B. C1s scan

| Acquisition Parameters : |                           |
|--------------------------|---------------------------|
| Parameter                |                           |
| Total acquisition time   | 1 mins 35.2 secs          |
| Number of Scans          | 5                         |
| Source Gun Type          | Al K Alpha                |
| Spot Size                | 900 $\mu\text{m}$         |
| Lens Mode                | Standard                  |
| Analyser Mode            | CAE : Pass Energy 20.0 eV |
| Energy Step Size         | 0.050 eV                  |
| Number of Energy Steps   | 381                       |

### C. O1s scan

| Acquisition Parameters : |                           |
|--------------------------|---------------------------|
| Parameter                |                           |
| Total acquisition time   | 1 mins 40.2 secs          |
| Number of Scans          | 5                         |
| Source Gun Type          | Al K Alpha                |
| Spot Size                | 900 $\mu\text{m}$         |
| Lens Mode                | Standard                  |
| Analyser Mode            | CAE : Pass Energy 20.0 eV |
| Energy Step Size         | 0.050 eV                  |
| Number of Energy Steps   | 401                       |

#### D. Mn2p scan

| Acquisition Parameters : |                           |
|--------------------------|---------------------------|
| Parameter                |                           |
| Total acquisition time   | 2 mins 20.2 secs          |
| Number of Scans          | 5                         |
| Source Gun Type          | Al K Alpha                |
| Spot Size                | 900 $\mu\text{m}$         |
| Lens Mode                | Standard                  |
| Analyser Mode            | CAE : Pass Energy 20.0 eV |
| Energy Step Size         | 0.050 eV                  |
| Number of Energy Steps   | 561                       |

#### E. Mn3p scan

| Acquisition Parameters : |                           |
|--------------------------|---------------------------|
| Parameter                |                           |
| Total acquisition time   | 1 mins 15.2 secs          |
| Number of Scans          | 5                         |
| Source Gun Type          | Al K Alpha                |
| Spot Size                | 900 $\mu\text{m}$         |
| Lens Mode                | Standard                  |
| Analyser Mode            | CAE : Pass Energy 20.0 eV |
| Energy Step Size         | 0.050 eV                  |
| Number of Energy Steps   | 301                       |

#### F. Mn3s scan

| Acquisition Parameters : |                           |
|--------------------------|---------------------------|
| Parameter                |                           |
| Total acquisition time   | 2 mins 0.2 secs           |
| Number of Scans          | 5                         |
| Source Gun Type          | Al K Alpha                |
| Spot Size                | 900 $\mu\text{m}$         |
| Lens Mode                | Standard                  |
| Analyser Mode            | CAE : Pass Energy 20.0 eV |
| Energy Step Size         | 0.050 eV                  |
| Number of Energy Steps   | 481                       |

## G. Cu2p scan

| <b>Acquisition Parameters :</b> |                           |
|---------------------------------|---------------------------|
| Parameter                       |                           |
| Total acquisition time          | 16 mins 40.8 secs         |
| Number of Scans                 | 25                        |
| Source Gun Type                 | Al K Alpha                |
| Spot Size                       | 900 $\mu\text{m}$         |
| Lens Mode                       | Standard                  |
| Analyser Mode                   | CAE : Pass Energy 20.0 eV |
| Energy Step Size                | 0.050 eV                  |
| Number of Energy Steps          | 801                       |

## Calculation of Faradaic efficiency

Faradaic efficiency test was done using a closed apparatus as shown in **Scheme S1**. The apparatus consists of three sealed chambers: (1) A glass chamber comprising of three electrode cell in which gas production occurs; (2) A gas transfer compartment and (3) a water displacement cell consisting of a marked cylinder with 100  $\mu\text{L}/0.1$  ml increments.

The solutions in the reaction cell as well as the gas transfer compartment were first saturated with oxygen and hydrogen gases. Next, the reaction was started using the  $\text{Cu-}\delta\text{-MnO}_2$  as working electrode and gas generation was started (either with positive voltage to working electrode in the case of oxygen evolution, or negative voltage with illumination from 1000  $\text{W}/\text{m}^2$  calibrated light source). This causes water level in graduated cylinder to rise. In this way all connecting tubes between compartments are now saturated with oxygen and hydrogen.

Finally, an electric charge of 3.0 Coulombs was passed through the working electrode until the water level in the graduated cylinder increased by 500  $\mu\text{L}/0.5$  ml. This change is associated with 2/3 hydrogen gas and 1/3 oxygen gas. After correcting for contributions from vapour pressure of water in the container(s), the proportion of hydrogen and oxygen obtained was determined in separate experiments and was found to be 321  $\mu\text{L}$  and 161  $\mu\text{L}$  respectively. Using gas laws, the quantity of gas produced was found to be 14.33 and 7.188  $\mu\text{mol}$  respectively, which requires 2.766 and 2.775 coulombs respectively to generate. This corresponds to a Faradaic efficiency of 92.2% and 92.5%, for the hydrogen generation and oxygen evolution reactions respectively.

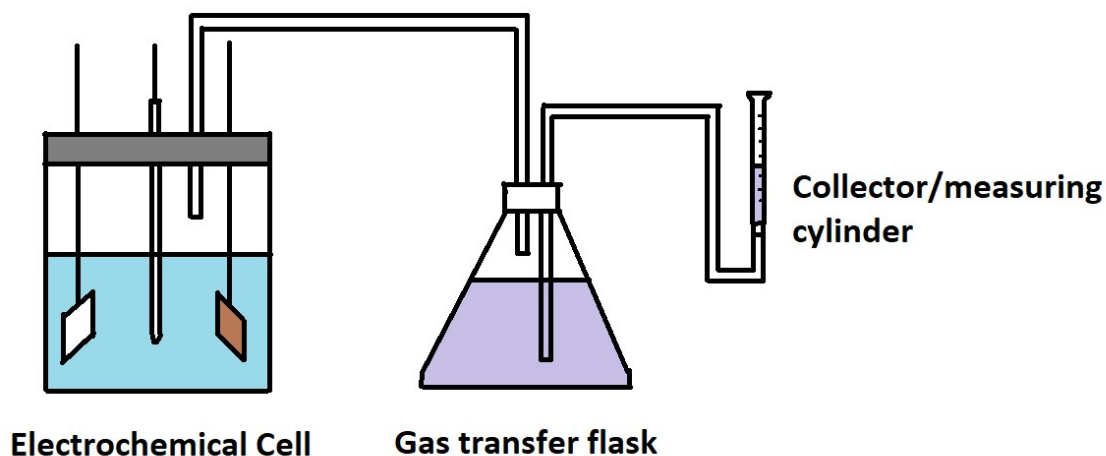

**Scheme S1.** Schematic of experimental setup used to measure gas generation by water displacement method.

## Calculation for Faradaic efficiency of Hydrogen and Oxygen Evolution Processes

In an ideal system with 100% Faradaic efficiency and no side reactions; 1 coulomb of current into an electrochemical cell generates 5.18  $\mu\text{mol}$  of  $\text{H}_2$  and 2.59  $\mu\text{mol}$  of  $\text{O}_2$ . This is based on the following equation:

$$\text{No. of moles} = \text{Coulombs} / (\text{Unsigned Numeric Charge on the ion} \times \text{Faraday Constant})$$

Thus, for 3 coulombs of charge given to the electrochemical cell, the quantities of H<sub>2</sub> and O<sub>2</sub> would be 15.54 μmol and 7.77 μmol, respectively.

Given the experimental conditions essentially correspond to room temperature and atmospheric pressure and that the ideal gas laws hold adequately in such conditions, we can then use gas laws *i.e.* 1 mol = 22.4 L, and so 1 μmol = 22.4 μL to determine the exact quantities of H<sub>2</sub> and O<sub>2</sub> evolved in the experiments.

In the experimental setup, 3 coulombs of electric charge was passed through to the electrochemical cell till a 500 μL displacement was observed. Of this, the component corresponding to the vapour phase H<sub>2</sub>O was subtracted using the vapour pressure tables wherein P<sub>H<sub>2</sub>O</sub> (partial pressure of water) at 28 °C is 28.4 torr. At the time of the initial setup, since the entire apparatus is air saturated with water-based electrolyte, the total pressure in the container(s) is 760 torr + 28.4 torr = 788.4 torr. After the experiment has completed and appropriate displacement obtained, the component corresponding to the vapour pressure of water is subtracted from the total pressure (= 788.4 torr) and thus the value of displacement caused due to O<sub>2</sub> and H<sub>2</sub> gases without the involvement of water vapour is found to be  $(760/788.4) * (500 \mu\text{L})$ , which gives us a value of 482 μL approximately. With 3 coulombs of energy passing; this 482 μl is attributed to a 2/3<sup>rd</sup> contribution of H<sub>2</sub> gas and 1/3<sup>rd</sup> contribution of O<sub>2</sub> gas, the proportions of the displacement thus obtained work out to be 321 μL and 161 μL for the displacements caused by H<sub>2</sub> gas and O<sub>2</sub> gas respectively.

Based on this method, the obtained quantities in μmol for the H<sub>2</sub> and O<sub>2</sub> gases produced in separate experiments are determined to be  $321/22.4 = 14.33 \mu\text{mol}$  and  $161/22.4 = 7.188 \mu\text{mol}^*$

\* = *Original value is 7.1875 μmol, which is rounded off to 7.188 μmol.*

When compared to the optimal (100% efficient) quantities of 15.54 and 7.77 μmol respectively for 3 coulombs of input charge; we find the faradaic efficiency to be 92.2% and 92.5% for the Hydrogen Generation and Oxygen Evolution Reactions, respectively.

If the contribution from water vapour in the container(s) is ignored; the entire 500 μL is considered as being caused by the H<sub>2</sub>/O<sub>2</sub> gas generation. In such a case, the quantities for H<sub>2</sub> and O<sub>2</sub> gases thus generated turn out to be 14.866 μmol and 7.466 μmol respectively, which correspond to Faradaic efficiencies of 95.66% and 96.09% respectively for the hydrogen generation and oxygen evolution reactions respectively.

## Stability Testing

Photocurrent stability was tested at 0.2 V vs. RHE by using chronoamperometry to observe the decay of photocurrent over time in a standard three-electrode electrochemical cell comprising of 1 M Na<sub>2</sub>SO<sub>4</sub> with pH adjusted to 4.0 as the electrolyte, Ag/AgCl reference electrode, Pt counter electrode and Cu- $\delta$ -MnO<sub>2</sub> as the working electrode with 1000 W/m<sup>2</sup> light source as described in main manuscript and 25 °C ambient temperature. It is observed that approximately 74.6% of initial photocurrent is retained after 7200 seconds of testing. The results may be seen below.

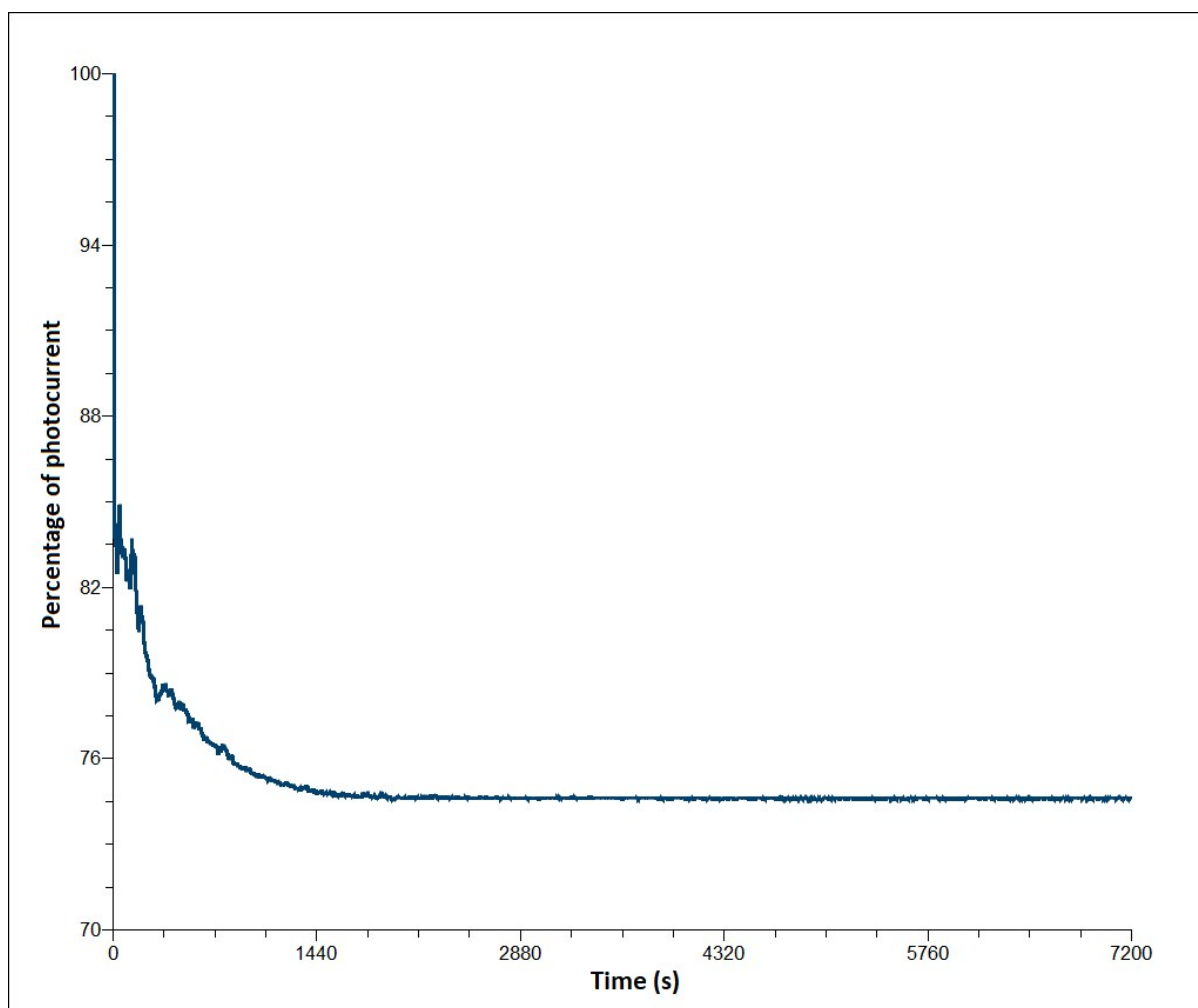

**Fig. S6** Chronoamperometric curve expressed as percentage of initial photocurrent over time for Cu- $\delta$ -MnO<sub>2</sub> thin film on FTO glass substrate.

## Electrochemical test to calculate recombination lifetimes

The EIS analysis was performed similarly to the other electrochemical tests; namely a three electrode configuration cell was used with Cu- $\delta$ -MnO<sub>2</sub> film on FTO glass substrate as the working electrode, a Pt counter electrode and Ag/AgCl reference electrode was utilised with input frequency range between 1 Hz and 10 MHz. The modelling was done based on a three RC series element circuit first described by Kumar et al. and is shown in Fig. S7, modelled against the electrochemical data described in the main manuscript. The results of the fitting are shown in Table S3 below. The values of  $\tau_2$  indicate effective recombination lifetime, while those of  $\tau_1 (=R_1C_1)$  and  $\tau_3 (=R_3C_3)$  are indicative of surface recombination lifetimes due to the presence of thin layers of oxide films at the film-to-substrate interface as well as the film-to-electrolyte interface<sup>viii</sup>. The element  $R_s$  indicates the circuit series resistance.

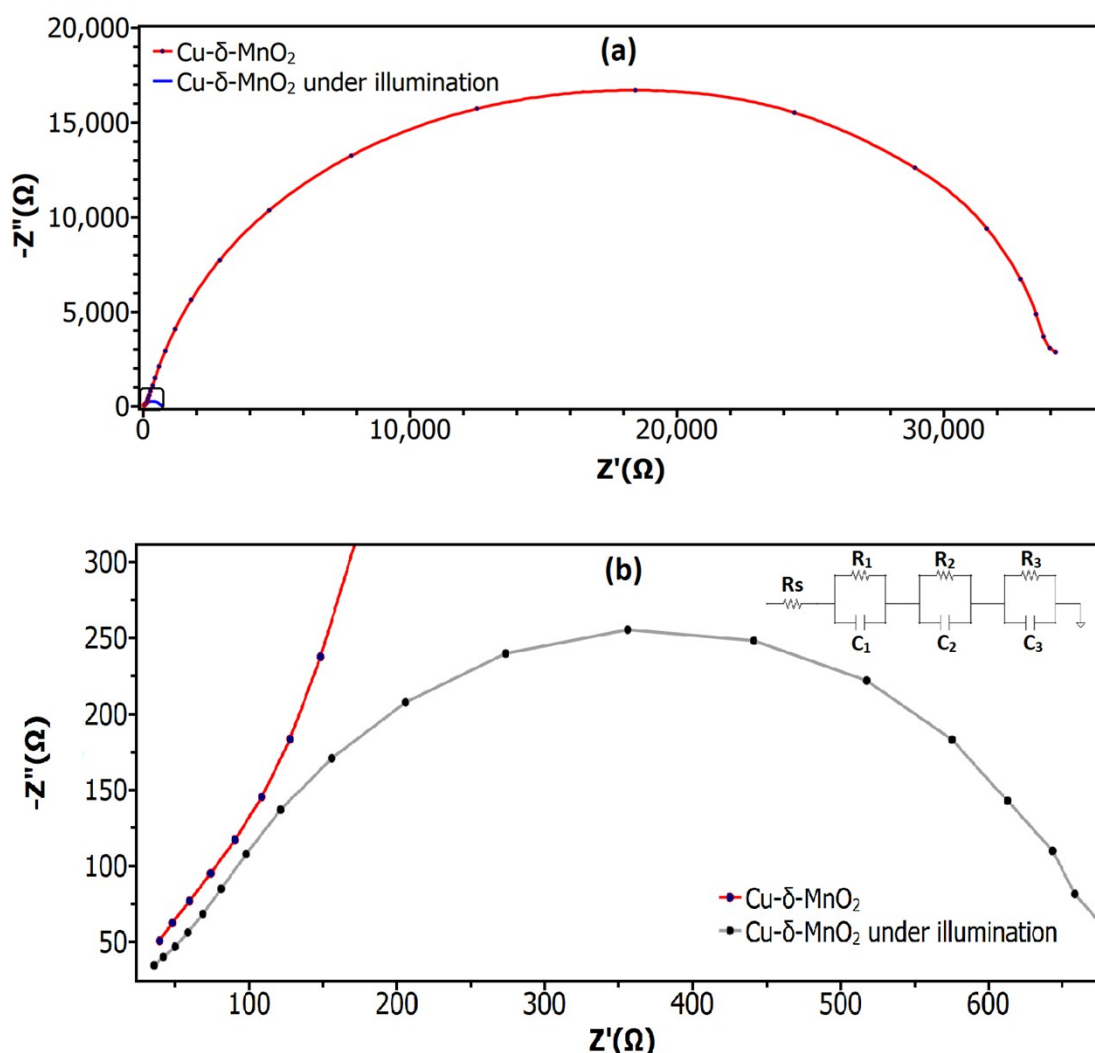

**Fig. S7** (a) Electrochemical Impedance Spectrum of Cu- $\delta$ -MnO<sub>2</sub> films with and without illumination. (b) Zoomed portion of EIS spectrum of highlighted region. Inset shows equivalent circuit utilised for fitting the EIS spectra for calculation of recombination lifetime.

**Table S3.** Comparison of electrochemical parameters obtained by fitting EIS data against the circuit model described in inset of **Fig. S7**.

| <b>Parameter</b>                                | <b>R<sub>s</sub></b><br><b>(<math>\Omega</math>)</b> | <b>R<sub>1</sub></b><br><b>(<math>\Omega</math>)</b> | <b>C<sub>1</sub></b><br><b>(F)</b> | <b>R<sub>2</sub></b><br><b>(<math>\Omega</math>)</b> | <b>C<sub>2</sub></b><br><b>(F)</b> | <b>R<sub>3</sub></b><br><b>(<math>\Omega</math>)</b> | <b>C<sub>3</sub></b><br><b>(<math>\Omega</math>)</b> | <b><math>\tau_1</math></b><br><b>(<math>\mu</math>s)</b> | <b><math>\tau_2</math></b><br><b>(<math>\mu</math>s)</b> | <b><math>\tau_3</math></b><br><b>(<math>\mu</math>s)</b> |
|-------------------------------------------------|------------------------------------------------------|------------------------------------------------------|------------------------------------|------------------------------------------------------|------------------------------------|------------------------------------------------------|------------------------------------------------------|----------------------------------------------------------|----------------------------------------------------------|----------------------------------------------------------|
| Cu- $\delta$ -MnO <sub>2</sub><br>(dark)        | 28                                                   | 553                                                  | 2.915<br>$\times 10^{-7}$          | 110.6                                                | 4.814<br>$\times 10^{-8}$          | 3337.35                                              | 1.925<br>$\times 10^{-7}$                            | 161.2                                                    | 5.32                                                     | 642.6                                                    |
| Cu- $\delta$ -MnO <sub>2</sub><br>(illuminated) | 20                                                   | 195                                                  | 1.348<br>$\times 10^{-6}$          | 48.72                                                | 3.363<br>$\times 10^{-7}$          | 425.40                                               | 2.733<br>$\times 10^{-6}$                            | 263.6                                                    | 16.39                                                    | 1162                                                     |



### Conversion from Ag/AgCl scale to RHE scale

For all electrochemical measurements, the Nernst equation was used to draw equivalent scale from Ag/AgCl to RHE:

$$E_{RHE} = E_{Ag/AgCl} + 0.059 pH + E_{Ag/AgCl}^{\circ}$$

## References:

- i. X. Zhao, L. Liu, Y. Zhang, H. Zhang and Y. Wang, *Nanotechnology*, 2017, **28**, 345402 (1-11).
- ii. J. Wu, Z. Ren, S. Du, L. Kong, B. Liu, W. Xi, J. Zhu and H. Fu, *Nano Res.*, 2016, **9**, 713-725.
- iii. R. Valdez, D. B. Grotjahn, D. K. Smith, J. M. Quintana and A. Olivas, *Int. J. Electrochem. Sci.*, 2015, **10**, 909-918.
- iv. X. Liu, S. Cui, Z. Sun, P. Du, *Electrochim. Acta*, 2015, **160**, 202-208.
- v. S. Cui, X. Liu, Z. Sun, and P. Du, *ACS Sustainable Chem. Eng.*, 2016, **4**, 2593-2600.
- vi. F. Zhou, F.; C. McDonnell-Worth, H. Li, J. Li, L. Spiccia and D. R. MacFarlane, *J. Mater. Chem. A*, 2015, **3**, 16642-16652.
- vii. S. Kumar, P. K. Singh, G. S. Chilana and S. R. Dhariwal, *Semicond. Sci. Technol.*, 2009, **24**, 095001 (1-8).
